# Supplementary material for: Enhanced in planta Fitness through Adaptive Mutations in EfpR, a Dual Regulator of Virulence and Metabolic Functions in the Plant Pathogen Ralstonia solanacearum
Source: PubMed Central journal article supplement (PMC5135139; doi:10.1371/journal.ppat.1006044), 2016-12-02

# A

## Ralstonia solanacearum – PM01 Carbon sources

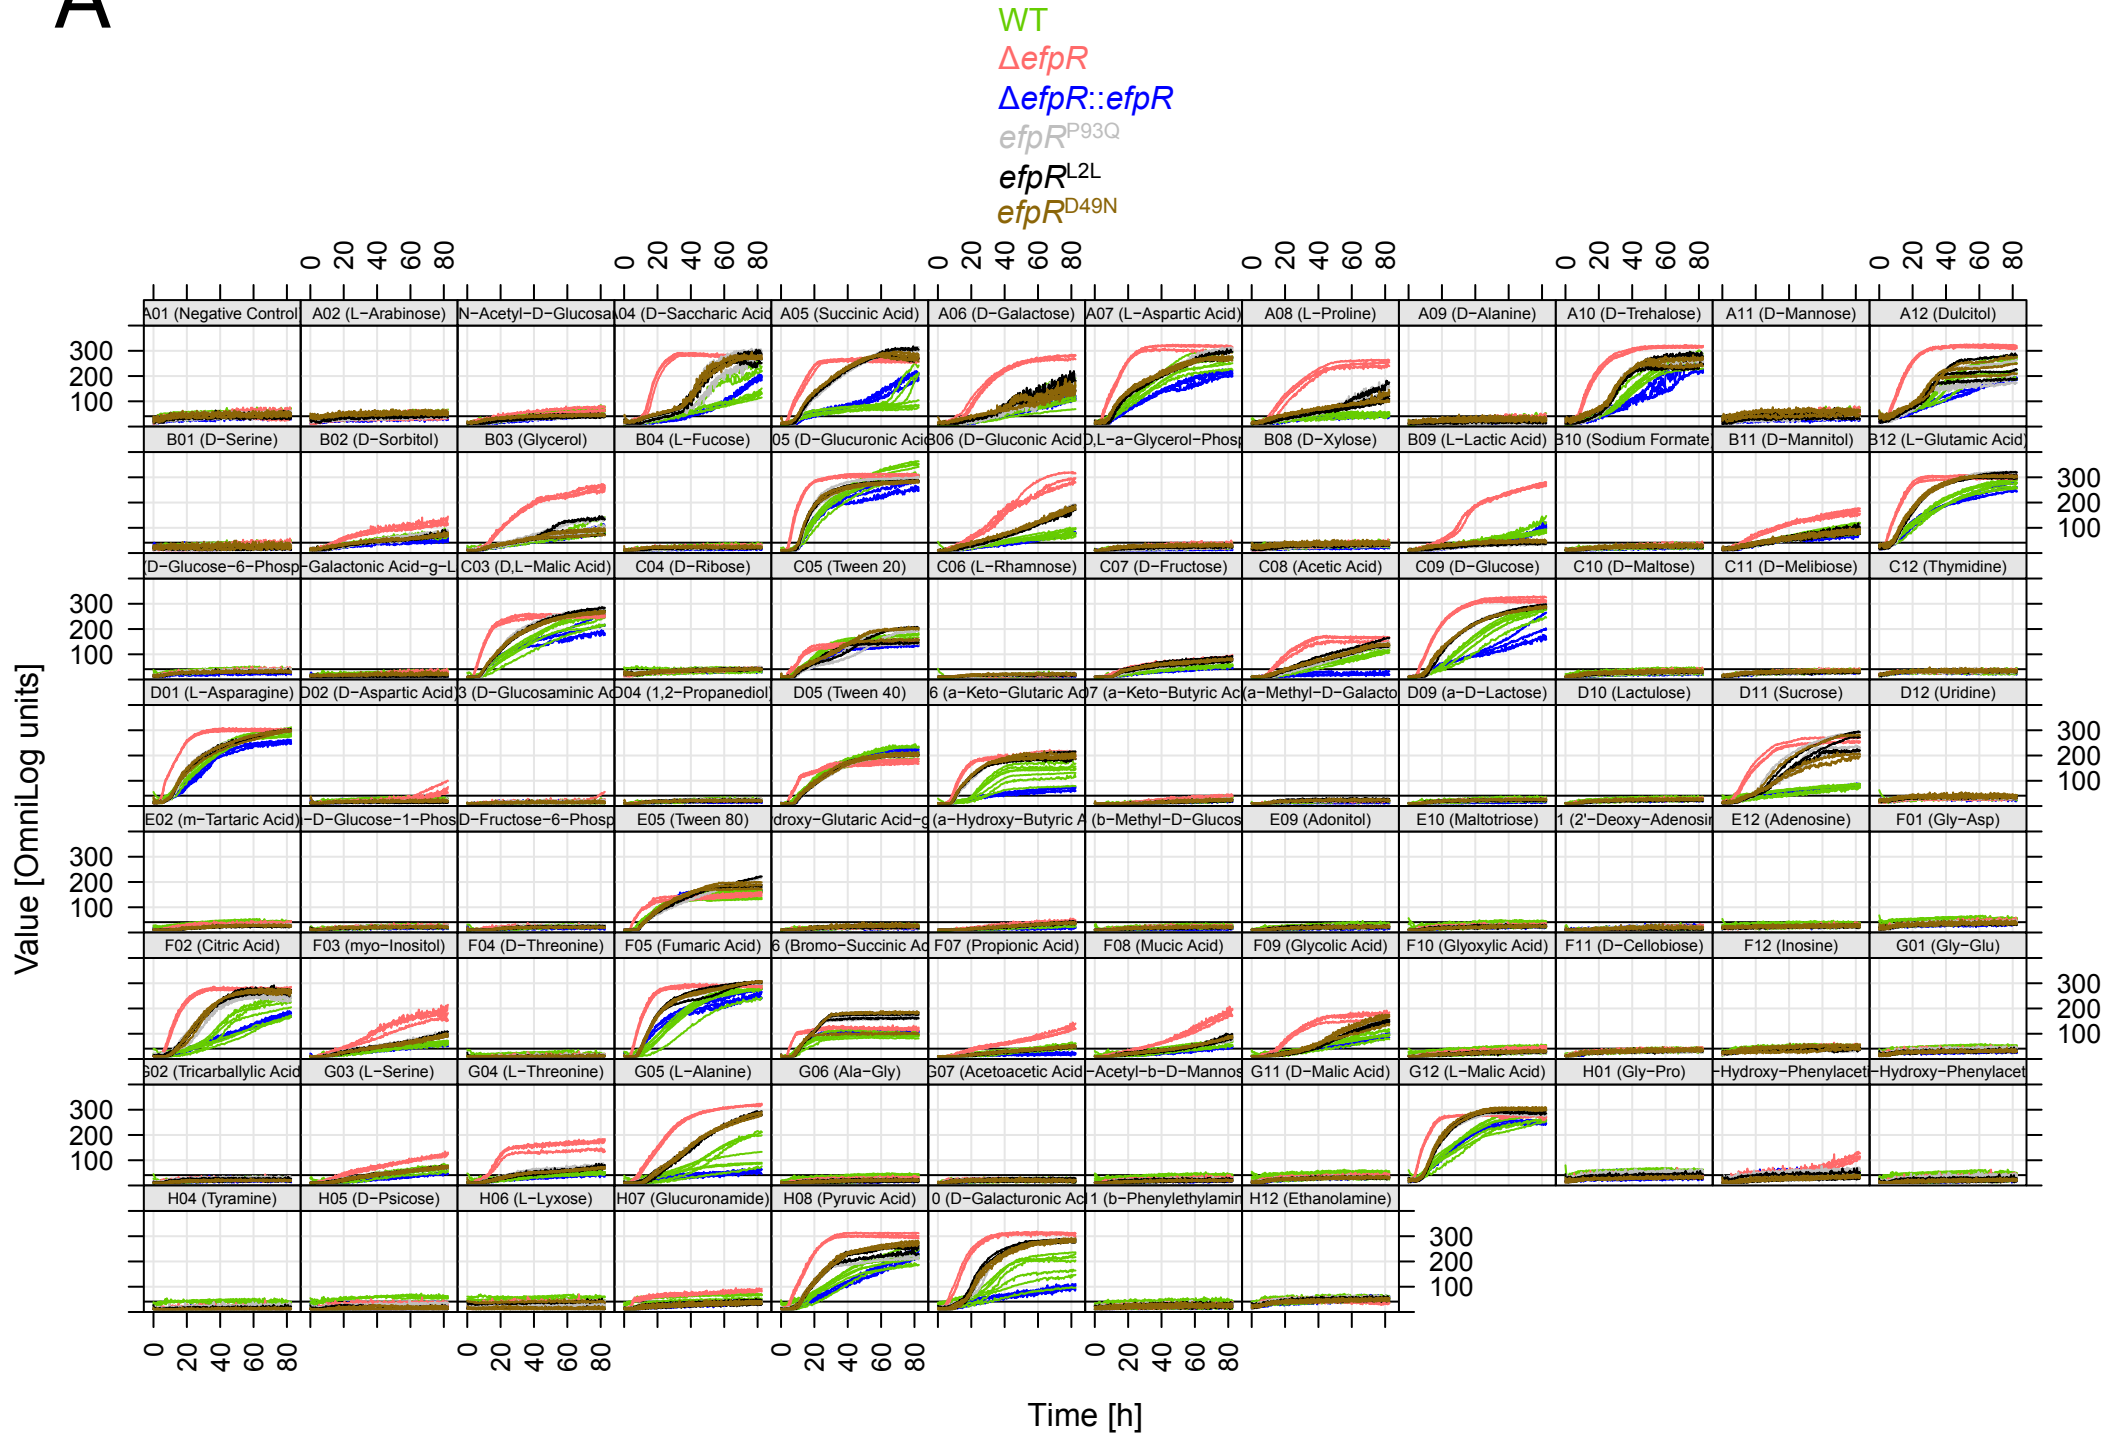



C

# Ralstonia solanacearum – PM03 Nitrogen sources

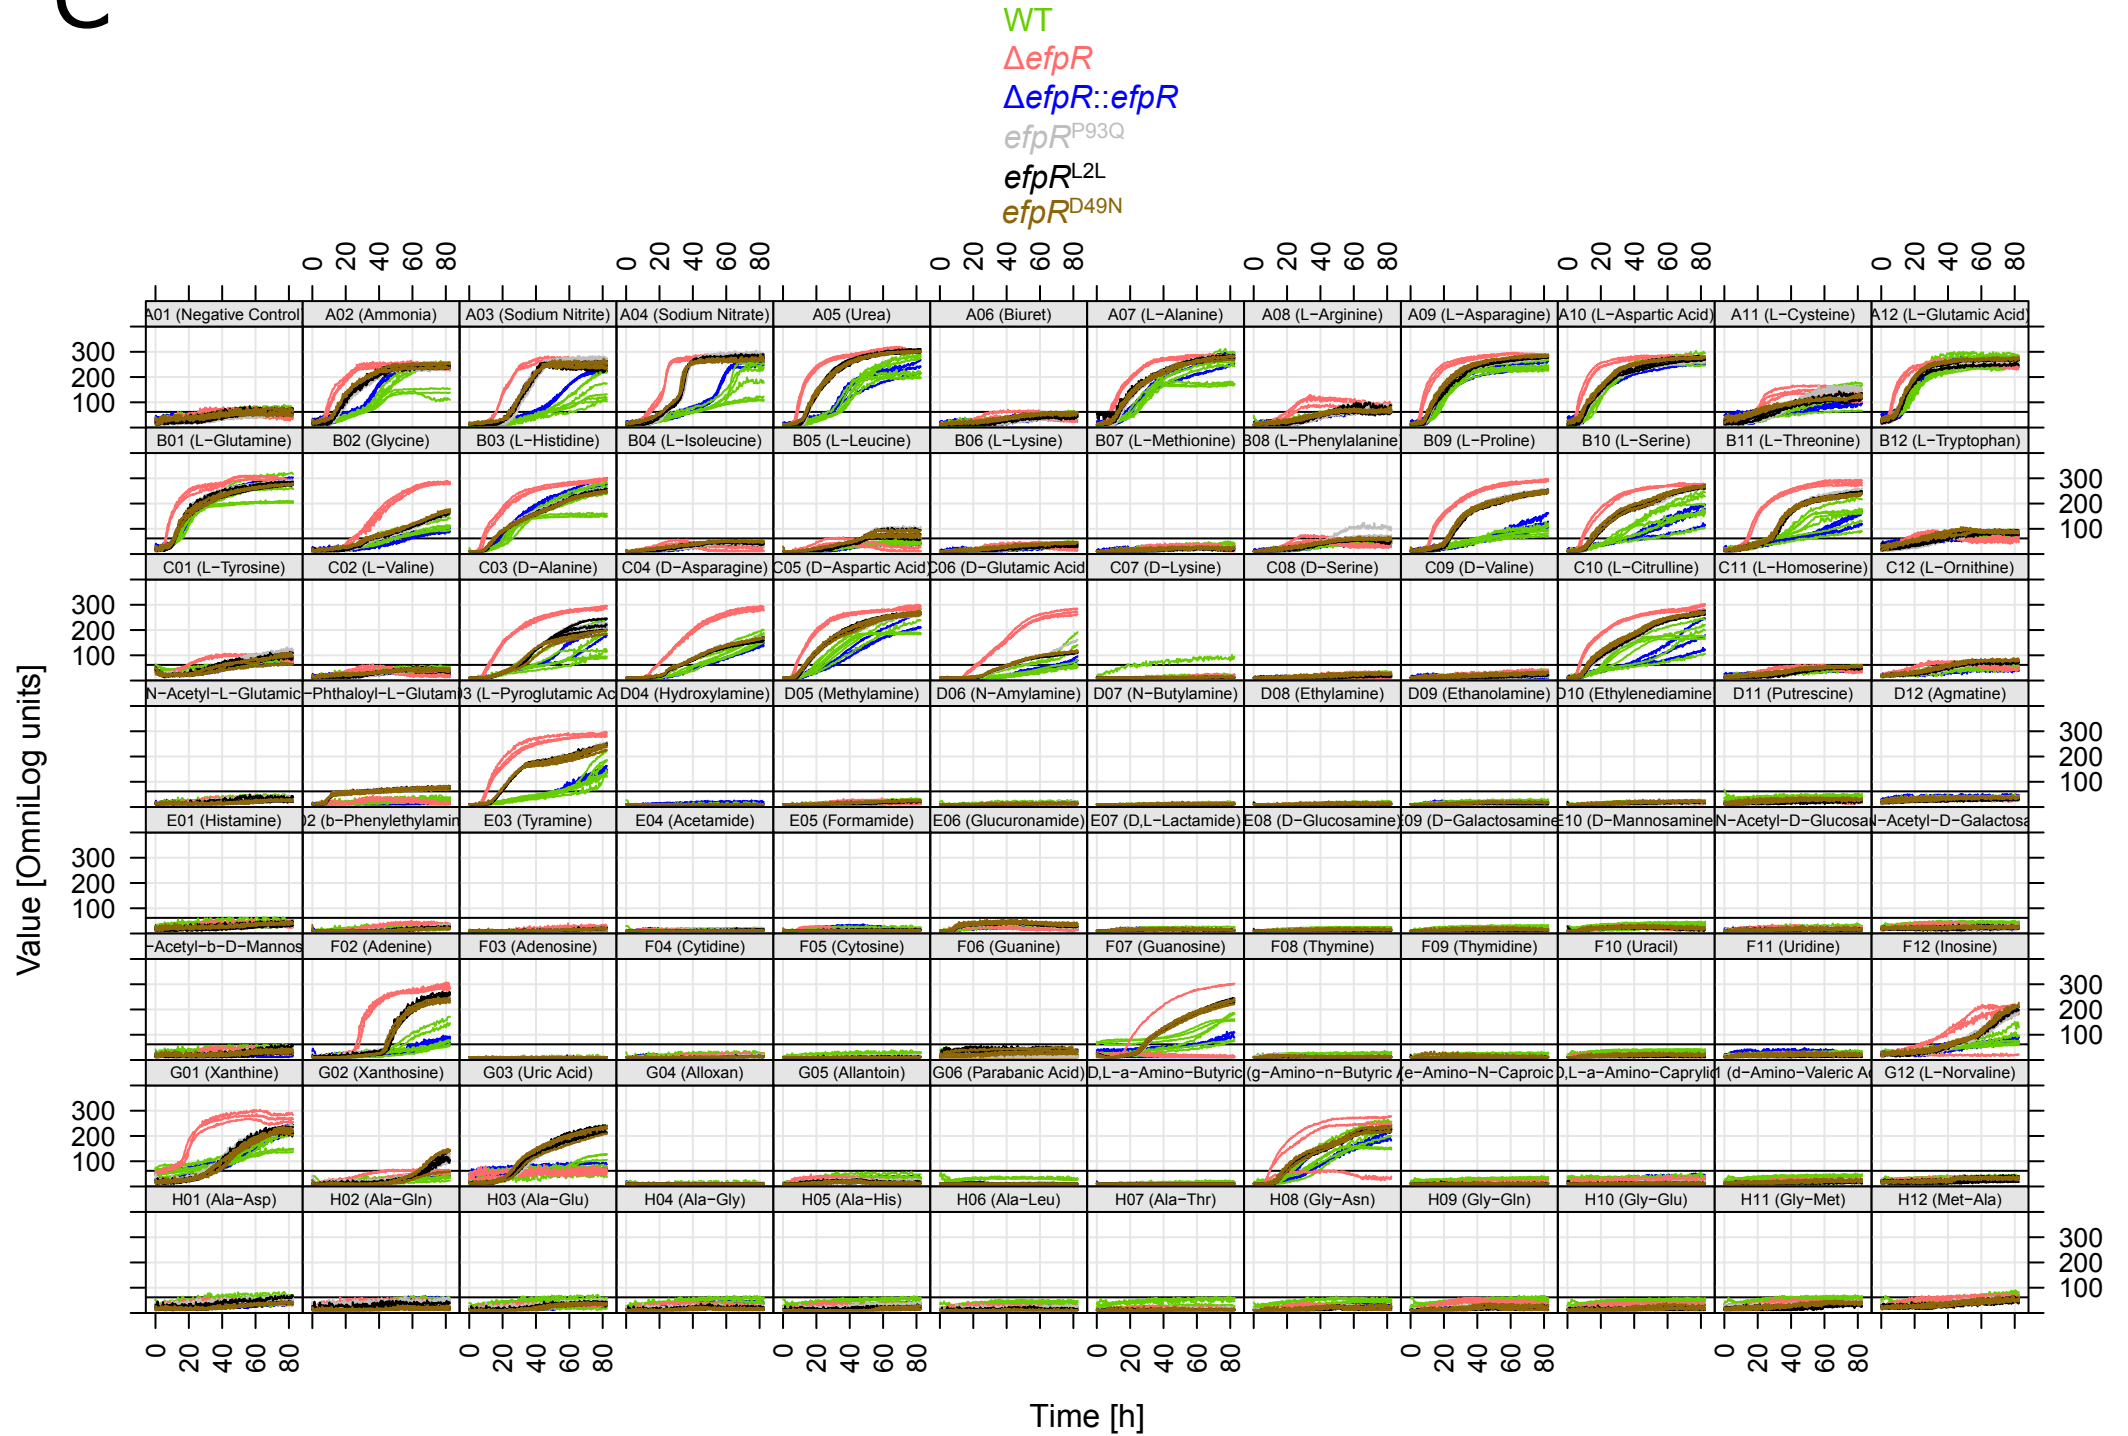

Supplement: ppat.1006044.s003.pdf [file ppat.1006044.s003.pdf]
