# Supplementary material for: Enhanced in planta Fitness through Adaptive Mutations in EfpR, a Dual Regulator of Virulence and Metabolic Functions in the Plant Pathogen Ralstonia solanacearum
Source: PubMed Central journal article supplement (PMC5135139; doi:10.1371/journal.ppat.1006044), 2016-12-02

A

## PM01 - Carbon sources usage

Color key and histogram

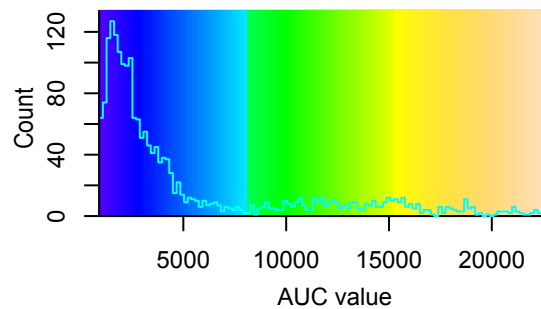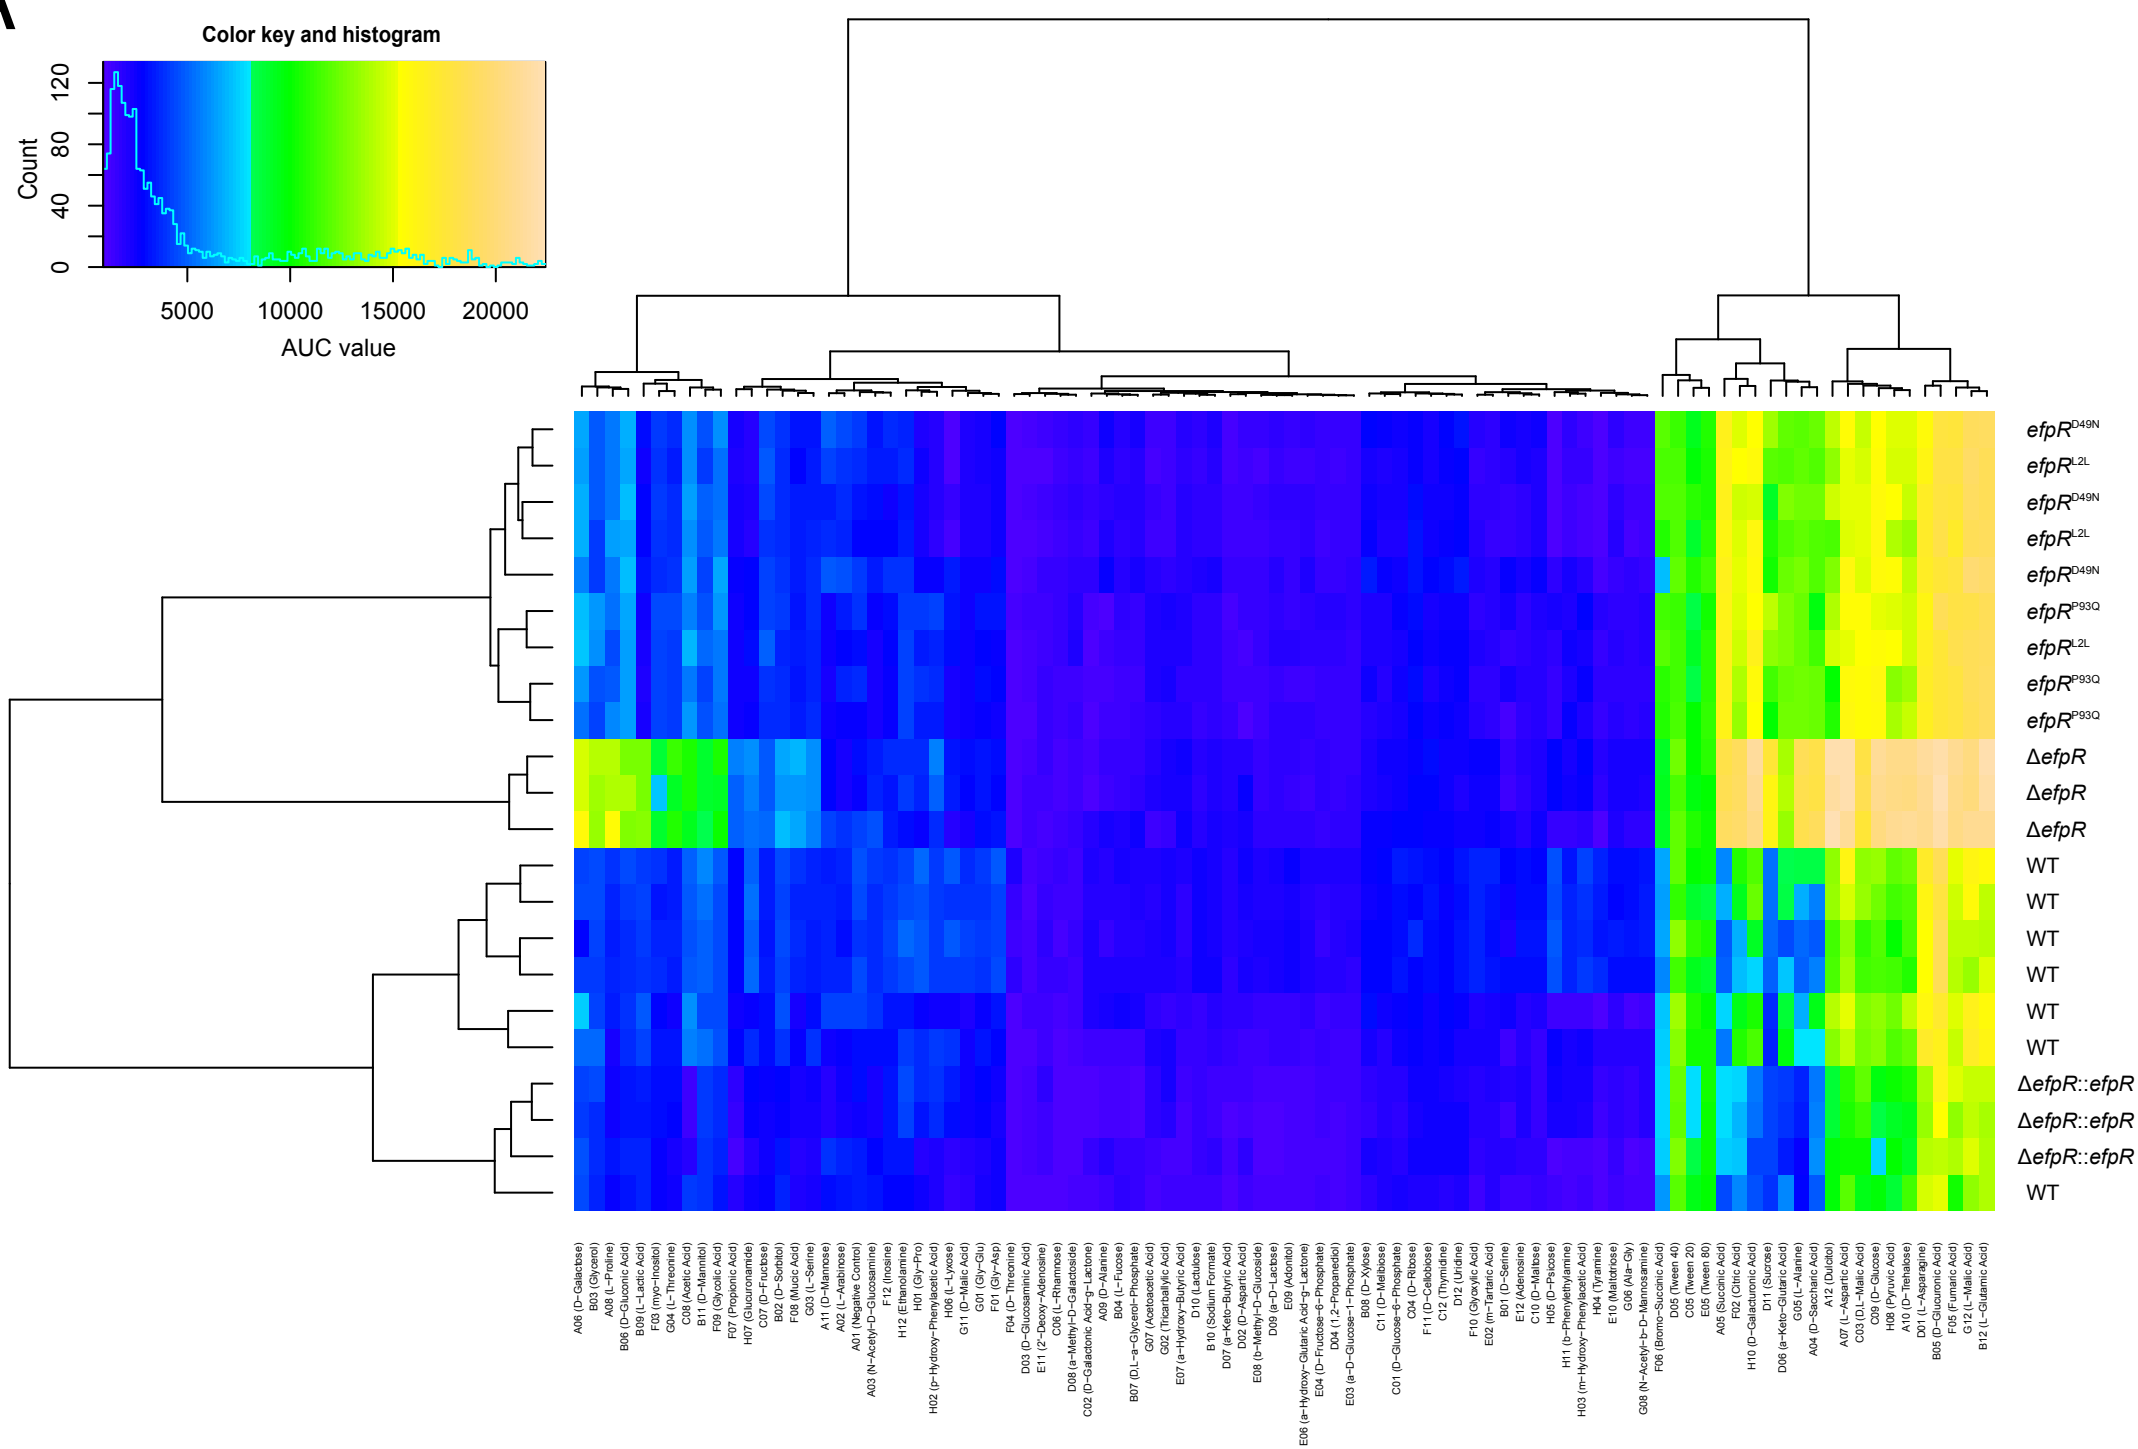

**B**

## PM02 - Carbon sources usage

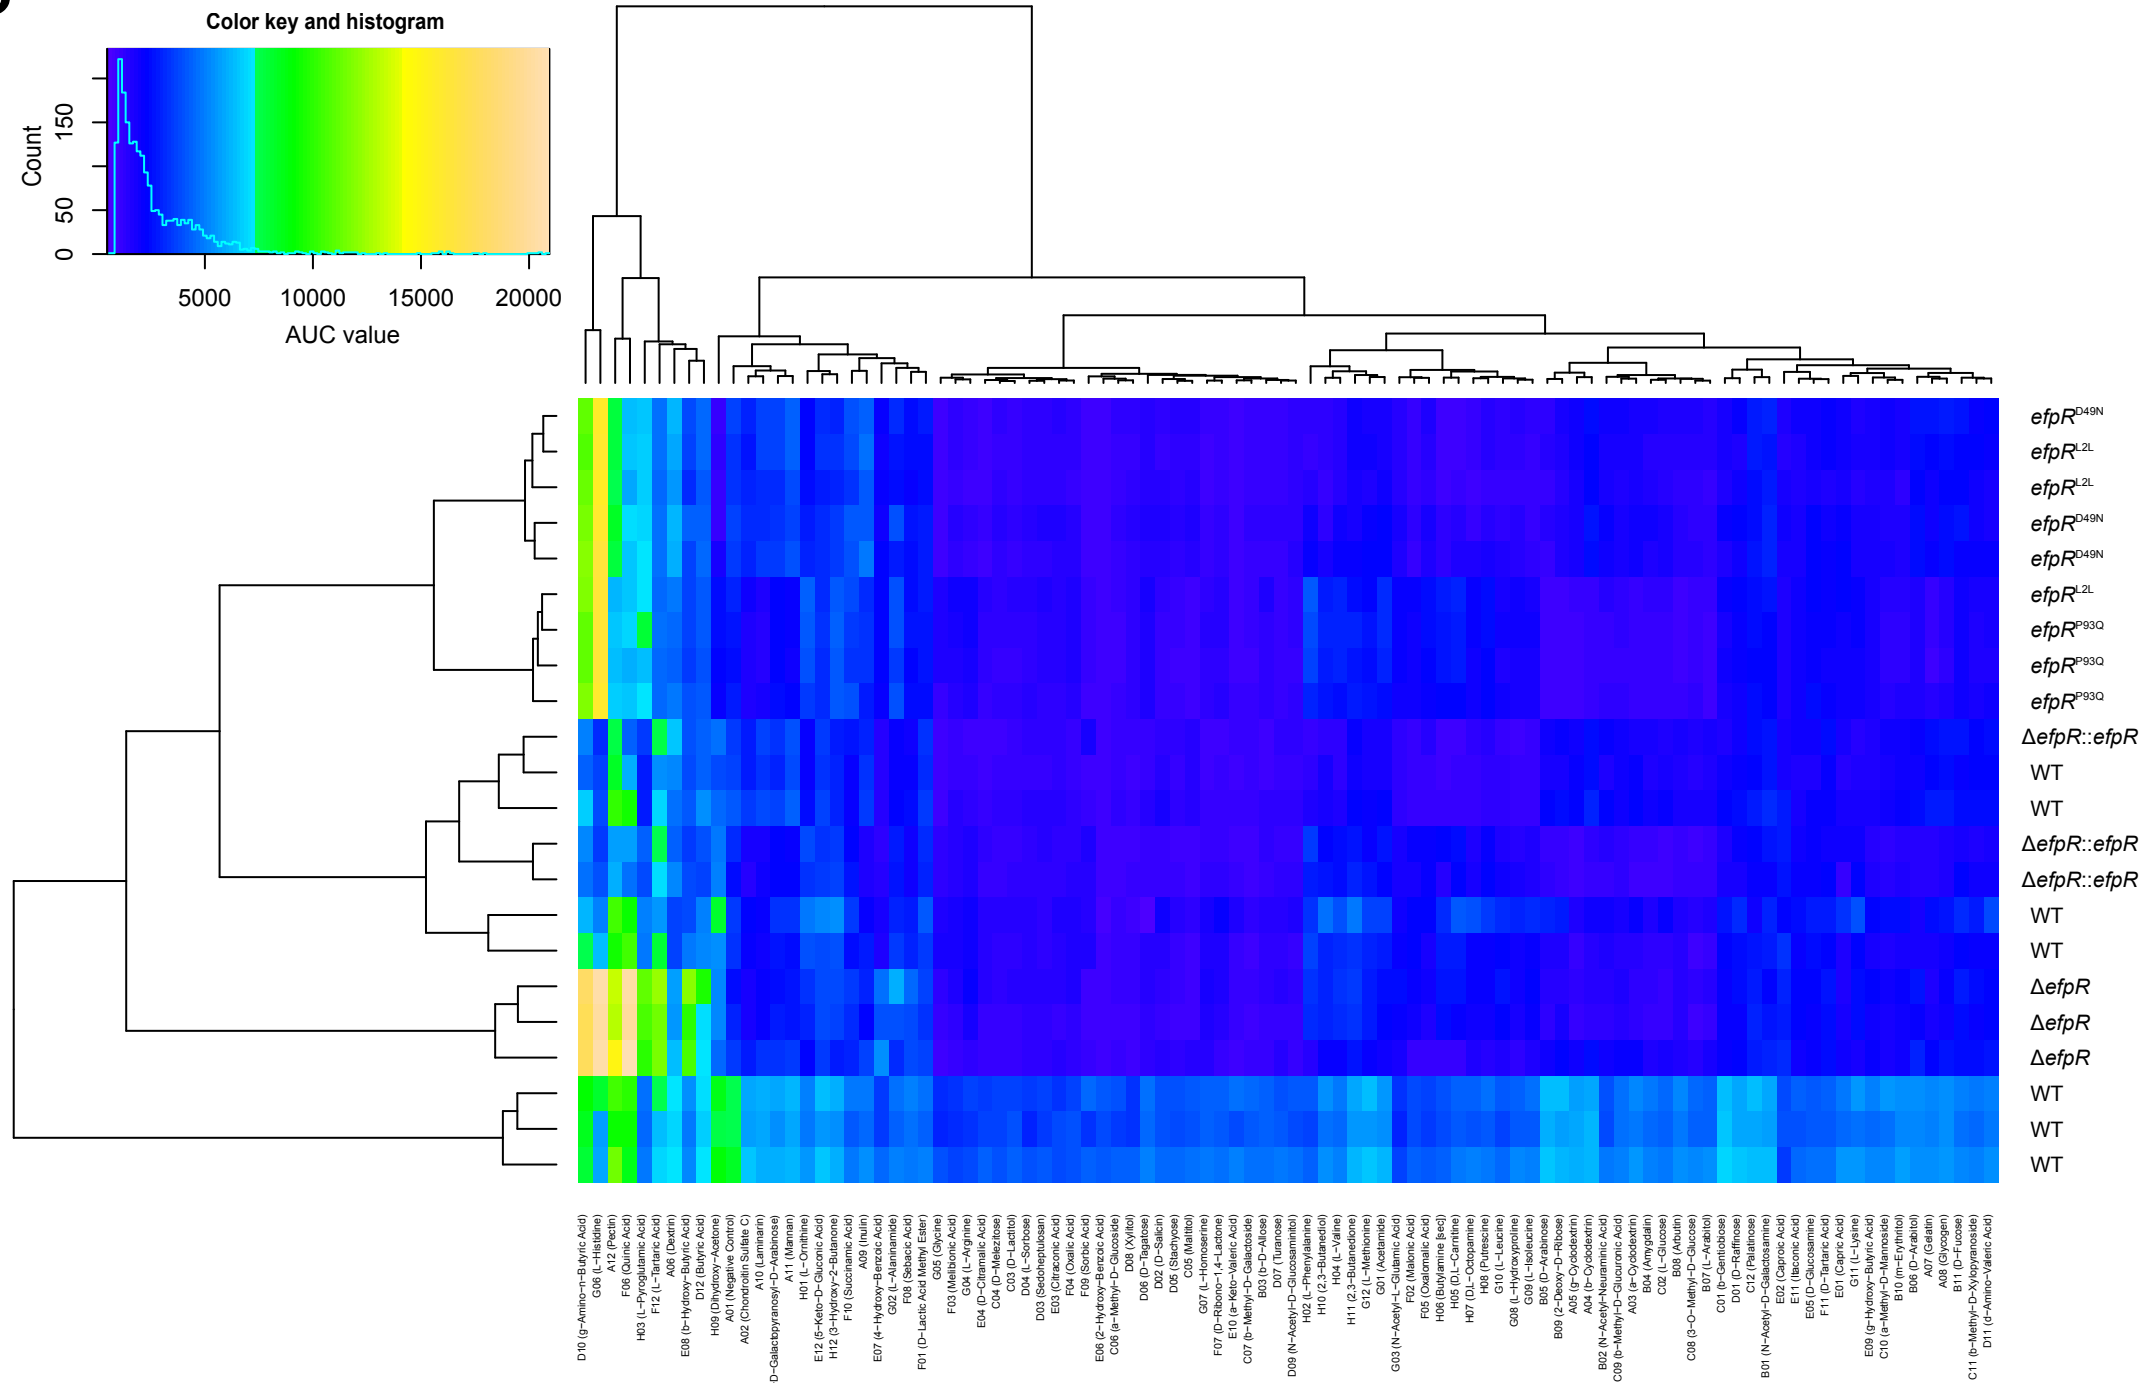

# C PM03 - Nitrogen sources usage

Color key and histogram

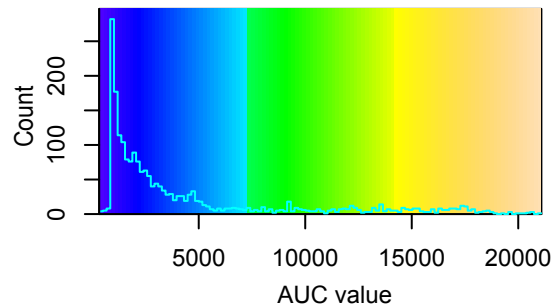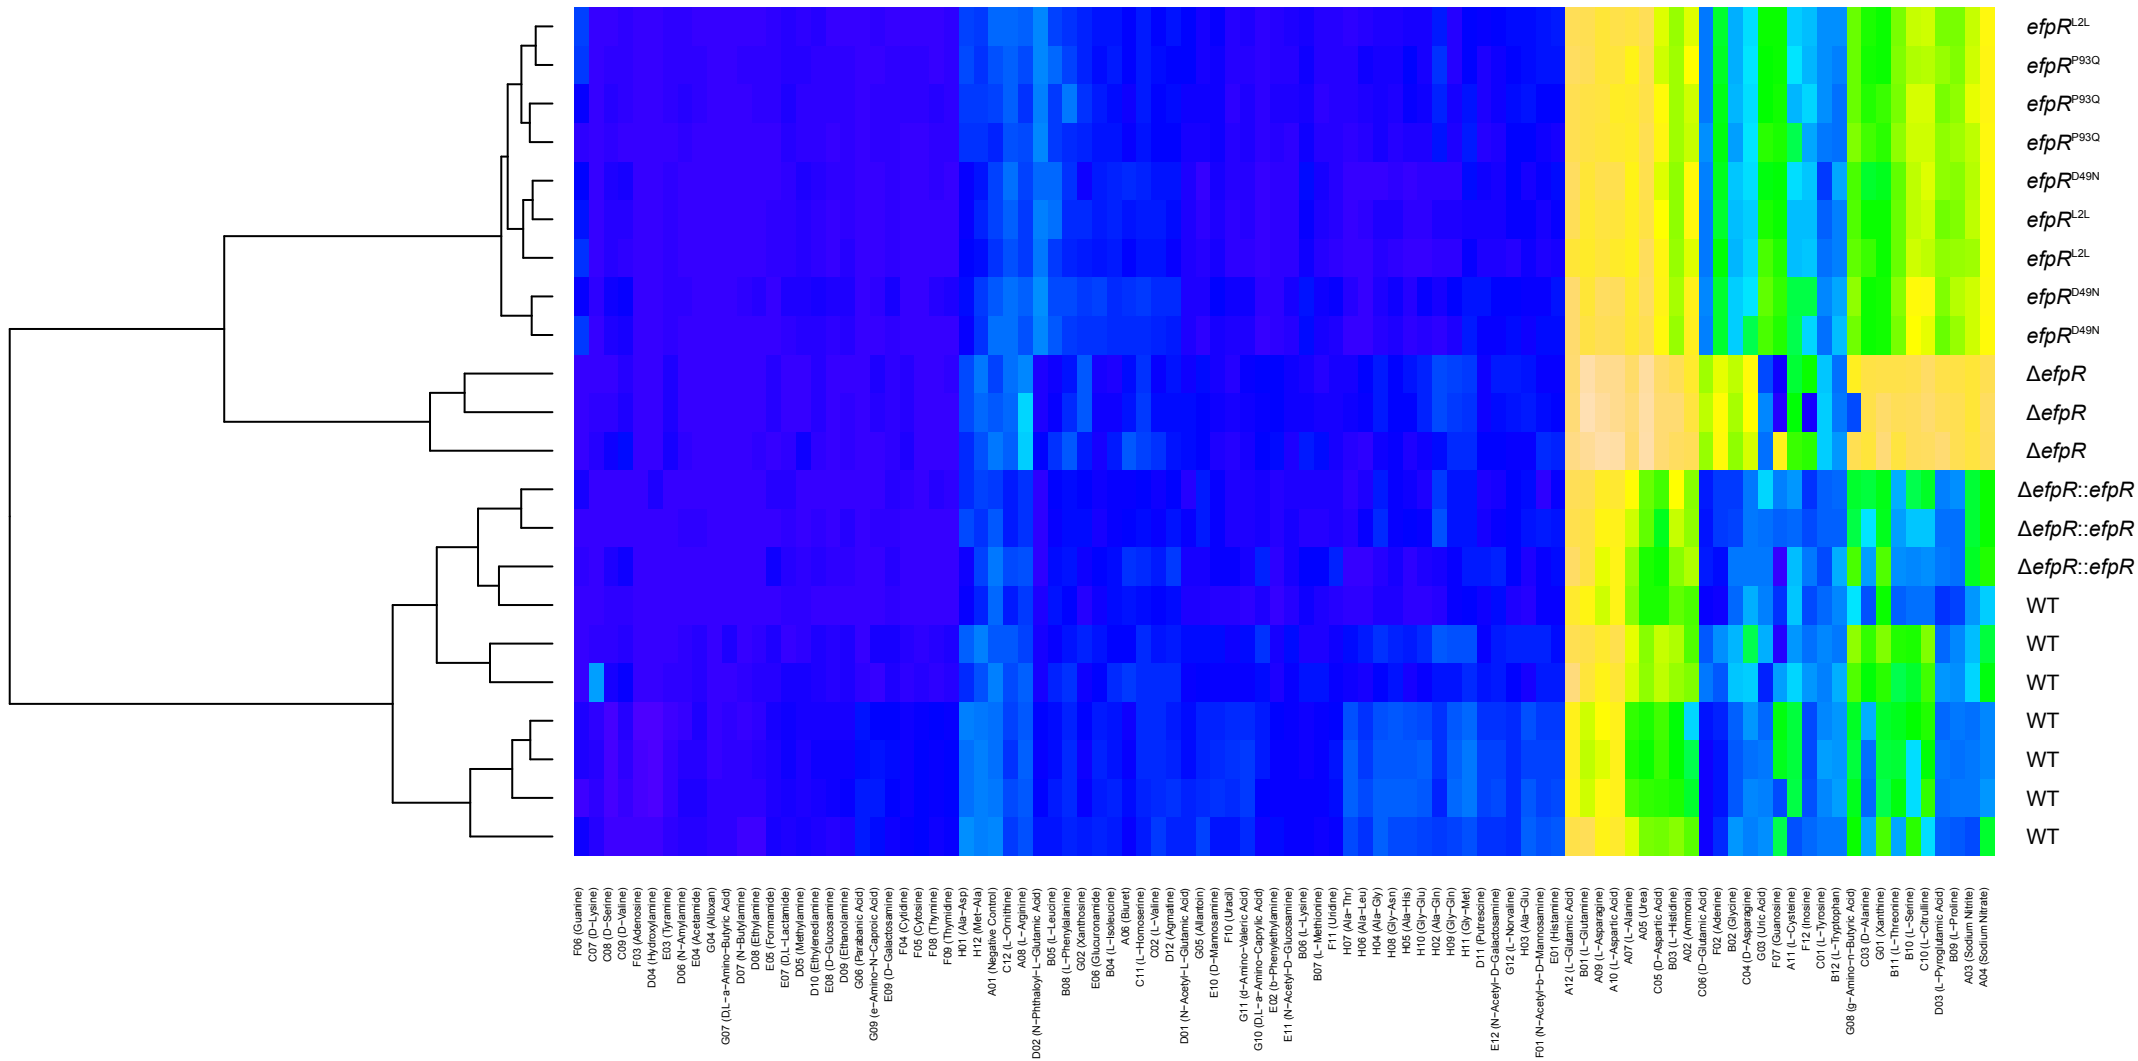

Supplement: ppat.1006044.s004.pdf [file ppat.1006044.s004.pdf]
