# Supplementary material for: Enhanced in planta Fitness through Adaptive Mutations in EfpR, a Dual Regulator of Virulence and Metabolic Functions in the Plant Pathogen Ralstonia solanacearum
Source: PLoS Pathog. 2016 Dec 2;12(12):e1006044. doi: 10.1371/journal.ppat.1006044 (PMC5135139; doi:10.1371/journal.ppat.1006044)
Supplement: S2 Table — (XLSX) [file ppat.1006044.s007.xlsx]

## Sheet: CONTENT
CONTENT
Sheet 1	Content	Description
Sheet 2	List of phenotypes	List of the phenotypes tested to be affected by EfpR regulation. Those fluxes were tested to carry a flux or not when expressions of down regulated (DEGs down-regulated) or up-regulated (DEGs up-regulated) genes in EfpR mutant are set to 0
Sheet 3	List of environments	List of the environments and their compositions in which EfpR regulation was tested. 0 means that the metabolite is not present in the medium and 1 means that the metabolites is present. Metabolites identifers correspond to the model Identifiers
Sheet 4	Results phenotypes prediction	Results of the simulations. Values are the number of conditions tested in which the phenotype is feasible, i.e. the flux throught the objective function is > 0
Sheet 5	Results catabolism prediction	Results of the simulations. Values are the optimal fluxes through energy production (catabolism - maxR_NGAME).

## Sheet: List Phenotypes
Name	Optimisation function	Description
maxR_BIOMASS	MAX(R_BIOMASS)	cell growth
maxR_R_NGAME	MAX(R_NGAME)	energetic
maxR_EX_GKC_storage_c	MAX(R_EX_GKC_storage_c)	Storage production, glycogen
maxR_EX_PHB_storage_c	MAX(R_EX_PHB_storage_c)	Storage production, polyhydroxybutyrate
maxR_BIOFILM_PGA	MAX(R_BIOFILM_PGA)	exopolysaccharide production involved in biofilm
maxR_EX_EPS_e_	MAX(R_EX_EPS_e_)	exopolysaccharide production involved in killing plant
maxR_EX_protein_Pme_e_	MAX(R_EX_protein_Pme_e_)	pectine methyl esterase secretion
maxR_EX_protein_Rsl2_e_	MAX(R_EX_protein_Rsl2_e_)	lectin Rsl2 secretion, cell attachment
maxR_T3SS_E_RipG7_S	MAX(R_T3SS_E_RipG7_S)	Effector RipG7 secretion
maxR_EX_etle_e_	MAX(R_EX_etle_e_)	ethylene production
maxR_EX_ptrc_e_	MAX(R_EX_ptrc_e_)	putrescine production
maxR_EX_3hoxid_e_	MAX(R_EX_3hoxid_e_)	3-hydroxy-oxindole production
maxR_swimming	MAX(R_swimming)	swimming motility
maxR_twitching	MAX(R_twitching)	twitching motility
maxR_EX_Tek_e_	MAX(R_EX_Tek_e_)	protein tek secretion
maxR_EX_ralf_e_	MAX(R_EX_ralf_e_)	ralfuranone production

## Sheet: List Environment
conditionName	condition Identifier	E_casamino_b	E_Cmedium_b	E_in_planta_b	E_Mmedium_b	E_pH_b	E_solid_surface_b	E_temperature_b	M_11cu2s_CopA_b	M_12dgr120_b	M_12dgr140_b	M_12dgr141_b	M_12dgr160_b	M_12dgr161_b	M_12dgr180_b	M_12dgr181_b	M_14aglucan_b	M_14bglucan_b	M_16aglucan_b	M_1mhis_b	M_23camp_b	M_23ccmp_b	M_23cgmp_b	M_23cump_b	M_2dhglcn_b	M_2feooh_b	M_2hyoxplac_b	M_2kmb_b	M_2obut_b	M_34dhphe_b	M_3hcinnm_b	M_3hoxid_b	M_3hpp_b	M_3hpppn_b	M_3ohpame_b	M_3oochslac_b	M_3oocta_b	M_4abut_b	M_4hba_b	M_4hbz_b	M_4hphac_b	M_5drib_b	M_5mtr_b	M_5oxpro_b	M_ac_b	M_acfv_b	M_acglu_b	M_acon_C_b	M_acpc_b
Minimal Medium with L-Glutamate	MMGLU	0	0	0	0	6.5	0	301.15	0	0	0	0	0	0	0	0	0	0	0	0	0	0	0	0	0	0	0	0	0	0	0	0	0	0	0	0	0	0	0	0	0	0	0	0	0	0	0	0	0
Minimal Medium plus CasaminoAcid agar plate - solid medium	MMCASASOLID	1	0	0	0	6.5	1	301.15	0	0	0	0	0	0	0	0	0	0	0	0	0	0	0	0	0	0	0	0	0	0	0	0	0	0	0	0	0	0	0	0	0	0	0	0	0	0	0	0	0
Minimal Medium with L-Glutamate at high cell density, i.e. > quorum sensing treshold	MMGLUPAME	0	0	0	0	6.5	0	301.15	0	0	0	0	0	0	0	0	0	0	0	0	0	0	0	0	0	0	0	0	0	0	0	0	0	0	0.0001	0	0	0	0	0	0	0	0	0	0	0	0	0	0
Tomato Apoplast	APO	1	0	1	0	6	1	301.15	0	0	0	0	0	0	0	0	0	0	0	0.004	0	0	0	0	0	0	0	0	0	0	0	0	0	0	0	0	0	0.599	0	0	0	0	0	0	0	0	0	0	0
Tomato Apoplast at high cell density, i.e. > quorum sensing treshold	APOPAME	0	0	1	0	6	1	301.15	0	0	0	0	0	0	0	0	0	0	0	0.0112	0	0	0	0	0	0	0	0	0	0	0	0	0	0	0.0001	0	0	0	0	0	0	0	0	0	0	0	0	0	0
Tomato Xylem	XYL	1	0	1	0	6	0	301.15	0	0	0	0	0	0	0	0	0	0	0	0.016	0	0	0	0	0	0	0	0	0	0	0	0	0	0	0	0	0	0.062	0	0	0	0	0	0	0	0	0	0.02	0
Tomato Xylem at high cell density, i.e. > quorum sensing treshold	XYLPAME	0	0	1	0	6	0	301.15	0	0	0	0	0	0	0	0	0	0	0	0.0201	0	0	0	0	0	0	0	0	0	0	0	0	0	0	0.0001	0	0	0	0	0	0	0	0	0	0	0	0	0.02	0
[truncated: 434 more columns]

## Sheet: Results_phenotypes
# number of conditions where each objective is activated	DEGs up-regulated	DEGs down-regulated
objective (phenotypes)	nb Conditions	nb Conditions
maxR_BIOFILM_PGA	7	0
maxR_BIOMASS	0	0
maxR_EX_3hoxid_e_	5	0
maxR_EX_EPS_e_	0	0
maxR_EX_GKC_storage_c	7	7
maxR_EX_PHB_storage_c	7	7
maxR_EX_Tek_e_	1	0
maxR_EX_etle_e_	7	0
maxR_EX_protein_Pme_e_	1	0
maxR_EX_protein_Rsl2_e_	4	0
maxR_EX_ptrc_e_	7	5
maxR_EX_ralf_e_	4	7
maxR_R_NGAME	7	7
maxR_T3SS_E_RipG7_S	1	0
maxR_swimming	7	0
maxR_twitching	7	0

## Sheet: Results_catabolism
Biolog wells	DEGs down-regulated	DEGs up-regulated
Conditions	maxR_NGAME	maxR_NGAME
PM01A01	0.00	0.00
PM01A02	0.00	0.00
PM01A03	0.00	0.00
PM01A04	0.00	8.36
PM01A05	8.36	8.36
PM01A06	8.36	8.36
PM01A07	8.36	8.36
PM01A08	8.36	8.36
PM01A09	8.36	8.36
PM01A10	8.36	8.36
PM01A11	0.00	0.00
PM01A12	8.36	8.36
PM01B01	0.00	0.00
PM01B02	8.36	8.36
PM01B03	8.36	8.36
PM01B04	0.00	0.00
PM01B05	8.36	8.36
PM01B06	8.36	8.36
PM01B07	0.00	0.00
PM01B08	0.00	0.00
PM01B09	8.36	8.36
PM01B10	0.00	5.00
PM01B11	8.36	8.36
PM01B12	8.36	8.36
PM01C01	0.00	0.00
PM01C02	0.00	0.00
PM01C03	8.36	8.36
PM01C04	0.00	0.00
PM01C05	0.00	0.00
PM01C06	0.00	0.00
PM01C07	8.36	8.36
PM01C08	8.36	0.00
PM01C09	8.36	8.36
PM01C10	0.00	0.00
PM01C11	0.00	0.00
PM01C12	0.00	0.00
PM01D01	8.36	8.36
PM01D02	0.00	0.00
PM01D03	0.00	0.00
PM01D04	0.00	0.00
PM01D05	0.00	0.00
PM01D06	8.36	8.36
PM01D07	0.00	0.00
PM01D08	0.00	0.00
PM01D09	0.00	0.00
PM01D10	0.00	0.00
PM01D11	8.36	8.36
PM01D12	0.00	0.00
PM01E01	8.36	8.36
PM01E02	0.00	0.00
PM01E03	0.00	0.00
PM01E04	0.00	0.00
PM01E05	0.00	0.00
PM01E06	0.00	0.00
PM01E07	0.00	0.00
PM01E08	0.00	0.00
PM01E09	0.00	0.00
PM01E10	0.00	0.00
PM01E11	0.00	0.00
PM01E12	0.00	0.00
PM01F01	0.00	0.00
PM01F02	8.36	8.36
PM01F03	8.36	8.36
PM01F04	0.00	0.00
PM01F05	8.36	8.36
PM01F06	8.36	8.36
PM01F07	8.36	0.00
PM01F08	0.00	8.36
PM01F09	8.36	0.00
PM01F10	0.00	0.00
PM01F11	0.00	0.00
PM01F12	8.36	8.36
PM01G01	0.00	0.00
PM01G02	0.00	0.00
PM01G03	8.36	8.36
PM01G04	8.36	8.36
PM01G05	8.36	8.36
PM01G06	0.00	0.00
PM01G07	0.00	0.00
PM01G08	0.00	0.00
PM01G09	8.36	8.36
PM01G10	8.36	8.36
PM01G11	0.00	0.00
PM01G12	8.36	8.36
PM01H01	0.00	0.00
PM01H02	8.36	8.36
PM01H03	0.00	0.00
PM01H04	0.00	0.00
PM01H05	0.00	0.00
PM01H06	0.00	0.00
PM01H07	0.00	0.00
PM01H08	8.36	8.36
PM01H09	0.00	0.00
PM01H10	8.36	8.36
PM01H11	0.00	0.00
PM01H12	0.00	0.00
PM02AA01	0.00	0.00
PM02AA02	0.00	0.00
PM02AA03	0.00	0.00
PM02AA04	0.00	0.00
PM02AA05	0.00	0.00
PM02AA06	8.36	8.36
PM02AA07	0.00	0.00
PM02AA08	0.00	0.00
PM02AA09	0.00	0.00
PM02AA10	0.00	0.00
PM02AA11	0.00	0.00
PM02AA12	8.36	0.00
PM02AB01	0.00	0.00
PM02AB02	0.00	0.00
PM02AB03	0.00	0.00
PM02AB04	0.00	0.00
PM02AB05	0.00	0.00
PM02AB06	0.00	0.00
PM02AB07	0.00	0.00
PM02AB08	0.00	0.00
PM02AB09	0.00	0.00
PM02AB10	0.00	0.00
PM02AB11	0.00	0.00
PM02AB12	0.00	0.00
PM02AC01	0.00	0.00
PM02AC02	0.00	0.00
PM02AC03	0.00	0.00
PM02AC04	0.00	0.00
PM02AC05	0.00	0.00
PM02AC06	0.00	0.00
PM02AC07	0.00	0.00
PM02AC08	0.00	0.00
PM02AC09	0.00	0.00
PM02AC10	0.00	0.00
PM02AC11	0.00	0.00
PM02AC12	0.00	0.00
PM02AD01	0.00	0.00
PM02AD02	0.00	0.00
PM02AD03	0.00	0.00
PM02AD04	0.00	0.00
PM02AD05	0.00	0.00
PM02AD06	0.00	0.00
PM02AD07	0.00	0.00
PM02AD08	0.00	0.00
PM02AD09	0.00	0.00
PM02AD10	8.36	0.00
PM02AD11	0.00	0.00
PM02AD12	8.36	0.00
PM02AE01	8.36	0.00
PM02AE02	8.36	0.00
PM02AE03	0.00	0.00
PM02AE04	0.00	0.00
PM02AE05	0.00	0.00
PM02AE06	0.00	0.00
PM02AE07	8.36	8.36
PM02AE08	8.36	0.00
PM02AE09	0.00	0.00
PM02AE10	0.00	0.00
PM02AE11	0.00	0.00
PM02AE12	0.00	0.00
PM02AF01	0.00	0.00
PM02AF02	0.00	0.00
PM02AF03	0.00	0.00
PM02AF04	0.00	0.00
PM02AF05	0.00	0.00
PM02AF06	0.00	8.36
PM02AF07	0.00	0.00
PM02AF08	0.00	0.00
PM02AF09	0.00	0.00
PM02AF10	0.00	0.00
PM02AF11	0.00	0.00
PM02AF12	8.36	8.36
PM02AG01	0.00	0.00
PM02AG02	0.00	0.00
PM02AG03	8.36	8.36
PM02AG04	8.36	0.00
PM02AG05	8.36	0.00
PM02AG06	8.36	0.00
PM02AG07	0.00	0.00
PM02AG08	0.00	0.00
PM02AG09	0.00	0.00
PM02AG10	0.00	0.00
PM02AG11	0.00	0.00
PM02AG12	0.00	0.00
PM02AH01	8.36	2.5
PM02AH02	3.75	0.00
PM02AH03	8.36	8.36
PM02AH04	0.00	0.00
PM02AH05	0.00	0.00
PM02AH06	0.00	0.00
PM02AH07	0.00	0.00
PM02AH08	0.00	0.00
PM02AH09	0.00	0.00
PM02AH10	0.00	0.00
PM02AH11	0.00	0.00
PM02AH12	0.00	0.00
